# Supplementary material for: Prediction of early recurrence of hepatocellular carcinoma within the Milan criteria after radical resection
Source: PubMed Central journal article supplement (PMC5609922; doi:10.18632/oncotarget.18799), 2017-06-28
Supplement: oncotarget-08-63299-s001.pdf [file oncotarget-08-63299-s001.pdf]

## Prediction of early recurrence of hepatocellular carcinoma within the Milan criteria after radical resection

### SUPPLEMENTARY MATERIALS

Supplementary Table 1: Baseline clinical characteristics of patients in the training cohort

| Variables                                       |                               | Value     |
|-------------------------------------------------|-------------------------------|-----------|
| Age, years                                      | Median                        | 55        |
|                                                 | Range                         | 17-80     |
|                                                 | Mean±SD                       | 53.9±10.7 |
| Male, n(%)                                      |                               | 158(79.8) |
| Cirrhosis, n(%)                                 | Yes                           | 164(82.8) |
| Etiology, n(%)                                  | HBV infection                 | 183(92.4) |
|                                                 | HCV infection                 | 12(6.1)   |
|                                                 | Alcohol abuse                 | 1(0.5)    |
|                                                 | Primary biliary cirrhosis     | 1(0.5)    |
|                                                 | HCV infection + Alcohol abuse | 1(0.5)    |
| Immuno-phenotype, n(%)                          | CK19+/GPC3+                   | 38(19.2)  |
|                                                 | CK19-/GPC3+                   | 130(65.7) |
|                                                 | CK19-/GPC3-                   | 30(15.2)  |
| Number of tumor nodule, n(%)                    | single                        | 161(83.3) |
|                                                 | two                           | 23(11.6)  |
|                                                 | three                         | 14(7.1)   |
| Tumor burden<br>Diameters of a single tumor(cm) | Median                        | 2.7       |
|                                                 | Range                         | 0.5-5.0   |
|                                                 | Mean±SD                       | 2.8±1.1   |
| Cumulative diameters of 2 or 3 tumors(cm)       | Median                        | 3.6       |
|                                                 | Range                         | 0.9-7.0   |
|                                                 | Mean±SD                       | 3.7±1.3   |
| Histological grading, n(%)                      | Poorly                        | 88(44.4)  |
|                                                 | Moderately                    | 102(51.5) |
|                                                 | Well                          | 8(4.0)    |
| Microvascular invasion, n(%)                    | Yes                           | 84(42.4)  |
| Macroscopic tumor thrombi, n(%)                 | Yes                           | 6(3.0)    |

SD: standard deviation; HBV: hepatitis B virus; HCV: hepatitis C virus; CK19: cytokeratin 19; GPC3: glypican 3.

Supplementary Table 2: Multicollinearity analysis

| Variable                                                   | Adjusted R <sup>2</sup> | Unstandardized coefficients |            | Standardized coefficients | t      | P     | Tolerance | VIF   |
|------------------------------------------------------------|-------------------------|-----------------------------|------------|---------------------------|--------|-------|-----------|-------|
|                                                            |                         | B                           | Std. Error | Beta                      |        |       |           |       |
| <b>CK19/GPC3 expression pattern</b><br>(bi-classification) | 0.118                   | -5.978                      | 2.833      | -0.147                    | -2.110 | 0.036 | 0.927     | 1.079 |
| <b>Histological grading</b><br>(bi-classification)         |                         | -7.363                      | 2.381      | -0.228                    | -3.092 | 0.002 | 0.824     | 1.213 |
| <b>Nodule number</b><br>(bi-classification)                |                         | -5.651                      | 3.030      | -0.137                    | -1.865 | 0.064 | 0.828     | 1.208 |
| <b>Microvascular invasion</b>                              |                         | -2.113                      | 2.493      | -0.065                    | -0.847 | 0.398 | 0.760     | 1.316 |
| <b>Macroscopic tumor thrombi</b>                           |                         | -7.967                      | 6.469      | -0.085                    | -1.232 | 0.220 | 0.939     | 1.065 |

Dependent Variable: recurrence; VIF: variance inflation factor; *Std. Error*: Standard error; CK: cytokeratin; GPC3: glypican 3  
A tolerance of less than 0.20 and/or a VIF of 10 and above indicates a multicollinearity problem.

Supplementary Table 3: Baseline clinical characteristics of patients in the validation cohort

| Variable                                  |                           | Value     |
|-------------------------------------------|---------------------------|-----------|
| Age, years                                | Median                    | 62.0      |
|                                           | Range                     | 43-87     |
|                                           | Mean±SD                   | 61.8±1.01 |
| Male, n(%)                                |                           | 61(85.9)  |
| Cirrhosis, n(%)                           | Yes                       | 66(93.0)  |
| Etiology, n(%)                            | HBV infection             | 65(91.5)  |
|                                           | HCV infection             | 4(5.6)    |
|                                           | Alcohol abuse             | 1(1.4)    |
|                                           | Primary biliary cirrhosis | 1(1.4)    |
| Immuno-phenotype, n(%)                    | CK19+/GPC3+               | 9(12.7)   |
|                                           | CK19-/GPC3+               | 48(67.6)  |
|                                           | CK19-/GPC3-               | 14(19.7)  |
| Number of tumor nodule, n(%)              | 1                         | 68(95.8)  |
|                                           | 2 or 3                    | 3(4.2)    |
| Tumor burden                              |                           |           |
| Diameters of a single tumor(cm)           | Median                    | 2.5       |
|                                           | Range                     | 1.0-5.0   |
|                                           | Mean±SD                   | 2.7±0.1   |
| Cumulative diameters of 2 or 3 tumors(cm) | Median                    | 3.5       |
|                                           | Range                     | 3.5-3.9   |
|                                           | Mean±SD                   | 3.6±0.1   |
| Histological grading, n(%)                | Poorly                    | 31(43.7)  |
|                                           | Moderately                | 31(43.7)  |
|                                           | Well                      | 9(12.7)   |
| Microvascular invasion, n(%)              | Yes                       | 5(7.0)    |
| Macroscopic tumor thrombi, n(%)           | Yes                       | 0(0.0)    |

SD: standard deviation; HBV: hepatitis B virus; HCV: hepatitis C virus; CK19: cytokeratin 19; GPC3: glypican 3.
